# Supplementary material for: Endovascular Treatment of Flow-Limiting Iliofemoral Stenosis Improves Left Ventricular Diastolic Function in Patients With HFpEF by Reducing Aortic Pulsatile Load
Source: PubMed Central journal article supplement — Circ Heart Fail. 2024 Sep 9;17(9):e011258. doi: 10.1161/CIRCHEARTFAILURE.123.011258 (PMC11398288; doi:10.1161/circheartfailure.123.011258), 2024-09-09
Supplement: hhf-17-e011258-s002.pdf [file hhf-17-e011258-s002.pdf]

## SUPPLEMENTAL MATERIAL

**Table S1:** HFA-PEFF score calculation for each patient at baseline according to guideline recommendations.

| BASELINE       |                                                   |                                                     |                                                                    |                                               |                                                                      |                                                                  |                |
|----------------|---------------------------------------------------|-----------------------------------------------------|--------------------------------------------------------------------|-----------------------------------------------|----------------------------------------------------------------------|------------------------------------------------------------------|----------------|
| Patient        | Functional Criteria                               |                                                     |                                                                    |                                               | Morphological Criteria                                               | Biomarker Criteria (SR)                                          | HFA-PEFF Score |
|                | septal $\dot{e}$ ,<br>cm/s<br><i>major &lt; 7</i> | lateral $\dot{e}$ ,<br>cm/s<br><i>major &lt; 10</i> | E/ $\dot{e}$<br><i>major <math>\geq 15</math><br/>minor 9 - 14</i> | TR- velocity,<br>m/s<br><i>major &gt; 2.8</i> | LAVI,<br>ml/m <sup>2</sup><br><i>major &gt; 34<br/>minor 29 - 34</i> | NT-proBNP,<br>pg/ml<br><i>major &gt; 220<br/>minor 125 - 220</i> |                |
| <b>EVT</b>     |                                                   |                                                     |                                                                    |                                               |                                                                      |                                                                  |                |
| 1              | 6                                                 | 8                                                   | 14.5                                                               | 2.9                                           | 36.07                                                                | 228                                                              | 6              |
| 2              | 5.5                                               | 9.3                                                 | 17.3                                                               | 2.8                                           | 32.58                                                                | 1041                                                             | 5              |
| 3              | 6                                                 | 9                                                   | 15                                                                 | 3.2                                           | 40.12                                                                | 458                                                              | 6              |
| 4              | 6                                                 | 8                                                   | 15.28                                                              | 3.3                                           | 36.07                                                                | 149                                                              | 5              |
| 5              | 4                                                 | 6                                                   | 23.37                                                              | 3                                             | 37.87                                                                | 1178                                                             | 6              |
| 6              | 6.7                                               | 8.3                                                 | 14.5                                                               | 2.9                                           | 33.14                                                                | 2119                                                             | 5              |
| 7              | 6.8                                               | 11.3                                                | 15.5                                                               | 3.3                                           | 34.83                                                                | 254                                                              | 6              |
| 8              | 5.6                                               | 10.2                                                | 15.9                                                               | 2.8                                           | 36.17                                                                | 226                                                              | 6              |
| 9              | 7.4                                               | 9.7                                                 | 16                                                                 | 3                                             | 34.05                                                                | 238                                                              | 6              |
| 10             | 7                                                 | 10.13                                               | 18                                                                 | 2.8                                           | 36.07                                                                | 241                                                              | 6              |
| 11             | 7.2                                               | 9.4                                                 | 14.8                                                               | 2.9                                           | 31.72                                                                | 233                                                              | 5              |
| 12             | 6.1                                               | 6.9                                                 | 15.6                                                               | 3                                             | 35.39                                                                | 242                                                              | 6              |
| 13             | 5.7                                               | 9.1                                                 | 15.3                                                               | 3.1                                           | 40.74                                                                | 830                                                              | 6              |
| 14             | 6.14                                              | 7                                                   | 14.7                                                               | 2.6                                           | 36.51                                                                | 1948                                                             | 6              |
| 15             | 3.7                                               | 5.6                                                 | 13.95                                                              | 3.3                                           | 34.39                                                                | 525                                                              | 6              |
| 16             | 5.28                                              | 11.85                                               | 16.2                                                               | 3.3                                           | 43.37                                                                | 163                                                              | 5              |
| 17             | 4                                                 | 9                                                   | 17.3                                                               | 2.9                                           | 33.33                                                                | 998                                                              | 5              |
| 18             | 7.64                                              | 7.78                                                | 13.37                                                              | 3.5                                           | 42.19                                                                | 5375                                                             | 6              |
| 19             | 4.2                                               | 9.8                                                 | 14.8                                                               | 3.3                                           | 39.43                                                                | 819                                                              | 6              |
| 20             | 6.8                                               | 9.8                                                 | 17.3                                                               | 2.9                                           | 34.62                                                                | 226                                                              | 6              |
| 21             | 5.2                                               | 7.9                                                 | 18.28                                                              | 3.1                                           | 39.76                                                                | 1100                                                             | 6              |
| 22             | 6.41                                              | 7.6                                                 | 15.4                                                               | 3.2                                           | 35.98                                                                | 322                                                              | 6              |
| 23             | 5.14                                              | 8.6                                                 | 16.3                                                               | 2.6                                           | 36.36                                                                | 281                                                              | 6              |
| 24             | 7.76                                              | 7.67                                                | 15.3                                                               | 2.7                                           | 36.73                                                                | 483                                                              | 6              |
| 25             | 5.59                                              | 7.3                                                 | 14.8                                                               | 2.9                                           | 33.51                                                                | 281                                                              | 5              |
| <b>Control</b> |                                                   |                                                     |                                                                    |                                               |                                                                      |                                                                  |                |
| 1              | 5.7                                               | 9                                                   | 15                                                                 | 3.3                                           | 39.78                                                                | 450                                                              | 6              |
| 2              | 6.2                                               | 7                                                   | 14.85                                                              | 2.8                                           | 38.20                                                                | 370                                                              | 6              |
| 3              | 5.6                                               | 7.4                                                 | 15.4                                                               | 2.9                                           | 35.64                                                                | 1432                                                             | 6              |
| 4              | 5.28                                              | 8                                                   | 15.6                                                               | 3                                             | 38.76                                                                | 280                                                              | 6              |
| 5              | 5.8                                               | 9.6                                                 | 17.8                                                               | 3.2                                           | 35.98                                                                | 335                                                              | 6              |

EVT = endovascular treatment, LAVI = left atrial volume index, NT-proBNP = N-terminal pro-

B-type natriuretic peptide, SR = sinus rhythm, TR = tricuspid regurgitation

**Table S2:** Calculation of the HFA-PEFF score for each patient at follow-up according to guideline recommendations.

| FOLLOW UP |                                       |                                         |                                           |                                            |                                                                   |                                                               |                |
|-----------|---------------------------------------|-----------------------------------------|-------------------------------------------|--------------------------------------------|-------------------------------------------------------------------|---------------------------------------------------------------|----------------|
| Patient   | Functional Criteria                   |                                         |                                           |                                            | Morphological Criteria                                            | Biomarker Criteria (SR)                                       | HFA-PEFF Score |
|           | septal é, cm/s<br><i>major &lt; 7</i> | lateral é, cm/s<br><i>major &lt; 10</i> | E/é<br><i>major ≥ 15<br/>minor 9 - 14</i> | TR- velocity, m/s<br><i>major &gt; 2.8</i> | LAVI, ml/m <sup>2</sup><br><i>major &gt; 34<br/>minor 29 - 34</i> | NT-proBNP, pg/ml<br><i>major &gt; 220<br/>minor 125 - 220</i> |                |
| EVT       |                                       |                                         |                                           |                                            |                                                                   |                                                               |                |
| 1         | 6.5                                   | 9                                       | 11.3                                      | 2.7                                        | 30.6                                                              | 201                                                           | 4              |
| 2         | 6.4                                   | 10.5                                    | 14.2                                      | 2.8                                        | 27.6                                                              | 1109                                                          | 4              |
| 3         | 7                                     | 10.1                                    | 12.8                                      | 3                                          | 36.6                                                              | 473                                                           | 6              |
| 4         | 6.7                                   | 8.9                                     | 13.4                                      | 3.1                                        | 32.8                                                              | 208                                                           | 4              |
| 5         | 4.9                                   | 7                                       | 15                                        | 2.9                                        | 34.3                                                              | 884                                                           | 6              |
| 6         | 7.4                                   | 9.2                                     | 12.5                                      | 2.7                                        | 31.4                                                              | 1890                                                          | 5              |
| 7         | 7.6                                   | 12.3                                    | 13.9                                      | 3.1                                        | 31.5                                                              | 212                                                           | 4              |
| 8         | 6.7                                   | 11.4                                    | 14.4                                      | 2.9                                        | 35.6                                                              | 166                                                           | 5              |
| 9         | 8                                     | 10.2                                    | 14                                        | 2.7                                        | 31.9                                                              | 313                                                           | 5              |
| 10        | 8.1                                   | 11.3                                    | 14.8                                      | 2.6                                        | 35                                                                | 282                                                           | 5              |
| 11        | 8                                     | 10.2                                    | 13.5                                      | 2.6                                        | 31.7                                                              | 187                                                           | 3              |
| 12        | 6.9                                   | 8                                       | 13.3                                      | 2.9                                        | 32.6                                                              | 196                                                           | 5              |
| 13        | 6.6                                   | 10.1                                    | 13.6                                      | 2.9                                        | 38.9                                                              | 890                                                           | 6              |
| 14        | 6.5                                   | 7                                       | 14.9                                      | 2.4                                        | 34.9                                                              | 2077                                                          | 6              |
| 15        | 4.7                                   | 6.5                                     | 13.4                                      | 3                                          | 31.2                                                              | 480                                                           | 5              |
| 16        | 6.3                                   | 12.6                                    | 14.8                                      | 3                                          | 38.8                                                              | 180                                                           | 5              |
| 17        | 4.9                                   | 10.5                                    | 15.1                                      | 2.7                                        | 31                                                                | 1101                                                          | 5              |
| 18        | 8                                     | 8.6                                     | 14                                        | 3.2                                        | 38                                                                | 4865                                                          | 6              |
| 19        | 5.1                                   | 9.9                                     | 12.9                                      | 3                                          | 34.9                                                              | 759                                                           | 6              |
| 20        | 7.5                                   | 11                                      | 14.2                                      | 2.7                                        | 31.9                                                              | 120                                                           | 3              |
| 21        | 6                                     | 9.2                                     | 16.6                                      | 2.9                                        | 38.6                                                              | 1058                                                          | 6              |
| 22        | 7.1                                   | 9.2                                     | 12.7                                      | 3.1                                        | 36                                                                | 301                                                           | 6              |
| 23        | 6                                     | 10                                      | 14                                        | 2.5                                        | 36.4                                                              | 210                                                           | 5              |
| 24        | 8.8                                   | 9                                       | 12                                        | 2.5                                        | 34                                                                | 417                                                           | 6              |
| 25        | 6.5                                   | 8.8                                     | 12.6                                      | 2.8                                        | 31.3                                                              | 192                                                           | 3              |
| Control   |                                       |                                         |                                           |                                            |                                                                   |                                                               |                |
| 1         | 6.2                                   | 9.4                                     | 15.5                                      | 3.2                                        | 40.9                                                              | 388                                                           | 6              |
| 2         | 6.3                                   | 7                                       | 15.2                                      | 3.2                                        | 39.9                                                              | 457                                                           | 6              |
| 3         | 5.7                                   | 7.5                                     | 15.2                                      | 3.1                                        | 39.6                                                              | 1383                                                          | 6              |
| 4         | 5.3                                   | 7.6                                     | 16.4                                      | 3.1                                        | 41.6                                                              | 490                                                           | 6              |
| 5         | 5.6                                   | 9.3                                     | 17.6                                      | 3.2                                        | 35.5                                                              | 274                                                           | 6              |

EVT = endovascular treatment, LAVI = left atrial volume index, NT-proBNP = N-terminal pro-B-type natriuretic peptide, SR = sinus rhythm, TR = tricuspid regurgitation

**Table S3:** Heart failure medication burden at baseline and follow-up.

| Pat. | Betablockers   |            | ACE inhibitor |           | ARB        |            | AldA      |           | Diuretics |           | SGLT2i    |            | Change |
|------|----------------|------------|---------------|-----------|------------|------------|-----------|-----------|-----------|-----------|-----------|------------|--------|
|      | Before         | FU         | Before        | FU        | Before     | FU         | Before    | FU        | Before    | FU        | Before    | FU         |        |
|      | <b>EVT</b>     |            |               |           |            |            |           |           |           |           |           |            |        |
| 1    | -              | -          | 16 mg (R)     | 8mg (R)   | -          | -          | -         | -         | -         | -         | -         | -          | ↓      |
| 2    | 50 mg (M)      | 50 mg (M)  | 32 mg (R)     | 32 mg (R) | -          | -          | 50 mg (E) | 25 (E)    | 20 mg (T) | 10 mg (T) | -         | -          | ↓      |
| 3    | 5 mg (N)       | 5 mg (N)   | 16 mg (R)     | 16 mg (R) | -          | -          | -         | -         | -         | -         | -         | -          | ⇒      |
| 4    | -              | -          | -             | -         | 40mg (Te)  | 40 mg (Te) | -         | -         | -         | -         | -         | -          | ⇒      |
| 5    | 100 mg (M)     | 100 Mg (M) | 32 mg (R)     | 32 mg (R) | -          | -          | -         | -         | 30 mg (T) | 20 mg(T)  | -         | -          | ↓      |
| 6    | 50 mg (M)      | 50 mg (M)  | 32 mg(R)      | 32 mg (R) | -          | -          | -         | -         | -         | -         | -         | -          | ⇒      |
| 7    | 50mg (M)       | 50mg (M)   | -             | -         | -          | 32 mg (C)  | -         | -         | -         | -         | -         | -          | ⇒      |
| 8    | 10 mg (N)      | 10 mg (N)  | 16 mg (R)     | 16 mg (R) | -          | -          | -         | -         | -         | -         | -         | -          | ⇒      |
| 9    | -              | -          | -             | -         | 32 mg (C)  | 32 mg (C)  | -         | -         | -         | -         | -         | -          | ⇒      |
| 10   | 75 mg (M)      | 75 mg (M)  | 32 mg (R)     | 32 mg (R) | -          | -          | -         | -         | -         | -         | -         | -          | ⇒      |
| 11   | 5 mg (N)       | 5 mg (N)   | -             | -         | 20 mg (Te) | 20 mg (Te) | -         | -         | -         | -         | -         | -          | ⇒      |
| 12   | 50 mg (M)      | 50 mg (M)  | 16 mg (R)     | 16 mg (R) | -          | -          | -         | -         | -         | -         | -         | -          | ⇒      |
| 13   | 100 mg (M)     | 100 mg (M) | -             | -         | 40 mg (Te) | 40 mg (Te) | -         | -         | -         | -         | -         | -          | ⇒      |
| 14   | -              | -          | 32 mg (R)     | 32 mg (R) | -          | -          | -         | -         | 40 mg (T) | 20 mg (T) | -         | -          | ↓      |
| 15   | -              | -          | 32 mg (R)     | 32 mg (R) | -          | -          | 50 mg (E) | 50 mg (E) | 20 mg (T) | 20 mg (T) | -         | -          | ⇒      |
| 16   | -              | -          | -             | -         | 80 mg (Te) | 80 mg (Te) | -         | -         | -         | -         | -         | -          | ⇒      |
| 17   | -              | -          | 32 mg (R)     | 32 mg (R) | -          | -          | -         | -         | -         | -         | -         | -          | ⇒      |
| 18   | 25 mg (Ca)     | 25 mg (Ca) | -             | -         | 40 mg (Te) | 40 mg (Te) | 25 mg (E) | 25 mg (E) | 10 mg (T) | 5 mg (T)  | -         | -          | ↓      |
| 19   | -              | -          | -             | -         | 32 mg (C)  | 32 (C)     | -         | -         | -         | -         | -         | -          | ⇒      |
| 20   | 50 mg (M)      | 50 mg (M)  | -             | -         | -          | -          | -         | -         | -         | -         | 10 mg (e) | 10 mg (e)- | ⇒      |
| 21   | 100 mg (M)     | 100 mg (M) | -             | -         | 16 mg (C)  | 16 mg (C)  | 25 mg (E) | 25 mg (E) | 20 mg (T) | 20 mg (T) | -         | -          | ⇒      |
| 22   | 50 mg (M)      | 50 mg(M)   | -             | -         | 80 mg (Te) | 80 mg (Te) | -         | -         | -         | -         | -         | -          | ⇒      |
| 23   | 75 mg (M)      | 75 mg (M)  | -             | -         | -          | -          | -         | -         | -         | -         | -         | -          | ⇒      |
| 24   | 25 mg (M)      | 25 mg (M)  | -             | -         | -          | -          | -         | -         | -         | -         | -         | -          | ⇒      |
| 25   | -              | -          | -             | -         | 32 mg (C)  | 32 mg (C)  | -         | -         | -         | -         | -         | -          | ⇒      |
|      | <b>Control</b> |            |               |           |            |            |           |           |           |           |           |            |        |
| 1    | 10 mg (N)      | 10 mg (N)  | 16 mg (R)     | 16 mg (R) | -          | -          | -         | -         | -         | -         | -         | -          | ⇒      |
| 2    | -              | -          | -             | -         | 80 mg (Te) | 80 mg (Te) | -         | -         | -         | -         | -         | -          | ⇒      |
| 3    | 50 mg (M)      | 50 mg (M)  | 32 mg (R)     | 32 mg (R) | -          | -          | 25 mg (E) | 25 mg (E) | 20 mg (T) | 20 mg (T) | -         | -          | ⇒      |
| 4    | 50 mg (M)      | 50 mg (M)  | 16 mg (R)     | 16 mg (R) | -          | -          | -         | -         | -         | -         | -         | -          | ⇒      |
| 5    | 75 mg (M)      | 75 mg (M)  | -             | -         | -          | -          | -         | -         | -         | -         | -         | -          | ⇒      |

ACE = angiotensin-converting-enzyme inhibitor, AldA = aldosterone antagonist; ARB = angiotensin receptor blocker, C = Candesartan, Ca = Carvedilol, E = Eplerenon, e = Empagliflozin, EVT = endovascular treatment, FU = follow-up, M = Metoprolol, N = Nebivolol, R= Ramipril, SGLT2i = Sodium-glucose cotransporter-2 inhibitors, T = Toreem, Te = Telmisartan

**Table S4:** Visual calcium scoring across different iliofemoral segments according to duplex sonography. Score of 0 if no wall heterogeneity or anechoic shadowing was observed, a score of 1 if there was evidence of wall heterogeneity without anechoic shadowing, and a score of 2 if there was clear anechoic shadowing or high-grade stenosis or total occlusion.

|     | Visual Calcium Scoring |   |    |                 |   |   |
|-----|------------------------|---|----|-----------------|---|---|
|     | EVT (n = 25)           |   |    | Control (n = 5) |   |   |
|     | 0                      | 1 | 2  | 0               | 1 | 2 |
| CIA | 0                      | 2 | 23 | 0               | 1 | 4 |
| EIA | 0                      | 3 | 22 | 0               | 1 | 4 |
| CFA | 0                      | 5 | 20 | 0               | 2 | 3 |
| SFA | 0                      | 5 | 20 | 0               | 2 | 3 |

CFA = common femoral artery, CIA = common iliac artery, EIA = external iliac artery, EVT = endovascular treatment; SFA = superficial femoral artery

**Table S5:** Procedural characteristics of the 30 PAD patients.

| <b>Procedural characteristics</b>            | <b>EVT (n=25)</b> | <b>Control (n=5)</b> |
|----------------------------------------------|-------------------|----------------------|
| Renal artery stenosis on angiography         | 0 (0%)            | 0 (0%)               |
| Periinterventional complication, n (%)       | 1 (4)             | 0 (0)                |
| Chronic total occlusion, n (%)               | 11 (44)           | 2 (40)               |
| <b>Vessel segment</b>                        |                   |                      |
| Iliac, n (%)                                 | 14 (56)           | 2 (40)               |
| Fempop., n (%)                               | 3 (12)            | 3 (60)               |
| Combined iliac and femopop. procedure, n (%) | 8 (32)            | -                    |
| Unilateral procedure, n (%)                  | 17 (68)           | -                    |
| Bilateral procedure, n (%)                   | 8 (32)            | -                    |
| <b>No. of stents, n (%)</b>                  | 23 (92)           | 0 (0)                |
| 1, n (%)                                     | 7 (28)            | -                    |
| 2, n (%)                                     | 11 (44)           | -                    |
| 3, n (%)                                     | 4 (16)            | -                    |
| 4, n (%)                                     | 1 (4)             | -                    |
| <b>DCB treatment</b>                         |                   |                      |
| 1, n (%)                                     | 3 (12)            | -                    |
| 2, n (%)                                     | 1 (4)             | -                    |

DCB = drug-coated balloon, EVT = endovascular treatment, Fempop. = femoropopliteal

**Table S6:** Adverse events during follow-up.

| <b>MACE</b>                         | <b>EVT<br/>(n = 25)</b> | <b>Control<br/>(n=5)</b> |
|-------------------------------------|-------------------------|--------------------------|
| CV death                            | 0 (0)                   | 0 (0)                    |
| AMI                                 | 0 (0)                   | 0 (0)                    |
| Stroke                              | 0 (0)                   | 0 (0)                    |
| Hospitalization for unstable angina | 0 (0)                   | 0 (0)                    |
| Heart failure Hospitalization       | 0 (0)                   | 0 (0)                    |
| Coronary revascularization          | 0 (0)                   | 0 (0)                    |
| <b>MALE</b>                         |                         |                          |
| Peripheral Intervention (%)         | 0 (0)                   | 0 (0)                    |
| Lower extremity bypass (%)          | 0 (0)                   | 0 (0)                    |
| Amputation (%)                      | 0 (0)                   | 0 (0)                    |

AMI = acute myocardial infarction; CV = cardiovascular; EVT = endovascular treatment; MACE= major adverse cardiac events; MALE = major adverse limb events

**Table S7:** Changes in PWV and compliance after adjustment for aMAP.

|            | EVT (n=25)                       |                               |                           | Control (n=5)                    |                               |                           |
|------------|----------------------------------|-------------------------------|---------------------------|----------------------------------|-------------------------------|---------------------------|
|            | p-value<br>(before vs.<br>after) | p-value<br>(before vs.<br>FU) | p-value<br>(after vs. FU) | p-value<br>(before vs.<br>after) | p-value<br>(before vs.<br>FU) | p-value<br>(after vs. FU) |
| PWV        | 0.11                             | 0.17                          | 0.75                      | 0.82                             | 0.38                          | 0.51                      |
| Compliance | 0.06                             | <b>0.010</b>                  | 0.45                      | 0.88                             | 0.87                          | 0.77                      |

EVT = endovascular treatment, FU = follow-up, aMAP = aortic mean arterial pressure, PWV = pulse wave velocity. Unpaired t-test was used to calculate P values.

**Table S8:** Baseline measures of aortic inflow, aortic function and peripheral hemodynamics.

|                                  | <b>EVT<br/>(n = 25)</b> | <b>Control<br/>(n=5)</b> | <b>p-value</b> |
|----------------------------------|-------------------------|--------------------------|----------------|
| <b>Aortic inflow</b>             |                         |                          |                |
| LVEF [%]                         | 56 ± 12                 | 53 ± 5                   | 0.73           |
| S' mean                          | 6.9 ± 1.3               | 6.8 ± 1.4                | 0.88           |
| E/e' mean                        | 16 ± 2                  | 16 ± 1                   | 0.25           |
| e' septal [cm/s]                 | 6 ± 1                   | 6 ± 0.3                  | 0.71           |
| e' lateral [cm/s]                | 9 ± 2                   | 8 ± 1                    | 0.57           |
| TR velocity [cm/s]               | 3.0 ± 0.2               | 3.1 ± 0.2                | 0.81           |
| LAVI [ml/m <sup>2</sup> ]        | 36.4 ± 3                | 37.7 ± 1.8               | 0.39           |
| LVMI [g/m <sup>2</sup> ]         | 143 ± 16                | 142 ± 15                 | 0.92           |
| SV [ml]                          | 53 ± 4                  | 53 ± 4                   | 0.90           |
| CO [L/min]                       | 3.7 ± 0.6               | 3.7 ± 0.4                | 0.96           |
| HR (bpm)                         | 69 ± 9                  | 73 ± 6                   | 0.36           |
| <b>Aortic function</b>           |                         |                          |                |
| aSBP [mmHg]                      | 128 ± 19                | 130 ± 14                 | 0.81           |
| aDBP [mmHg]                      | 75 ± 10                 | 74 ± 9                   | 0.81           |
| aMAP [mmHg]                      | 95 ± 10                 | 92 ± 10                  | 0.65           |
| aPP [mmHg]                       | 53 ± 19                 | 57 ± 10                  | 0.70           |
| AIx@HR75 [%]                     | 32 ± 8                  | 31 ± 4                   | 0.71           |
| PWV [m/s]                        | 11.1 ± 2.9              | 11.4 ± 1.5               | 0.85           |
| Compliance [mL/mmHg]             | 1.13 ± 0.4              | 0.97 ± 0.3               | 0.42           |
| <b>Peripheral hemodynamics</b>   |                         |                          |                |
| bSBP [mmHg]                      | 136 ± 20                | 132 ± 13                 | 0.66           |
| bDBP [mmHg]                      | 74 ± 10                 | 68.4 ± 10                | 0.27           |
| bMAP [mmHg]                      | 87 ± 28                 | 90 ± 10                  | 0.84           |
| bPP [mmHg]                       | 63 ± 21                 | 64 ± 10                  | 0.91           |
| TPR [dynes x s/cm <sup>5</sup> ] | 2043 ± 332              | 2049 ± 399               | 0.97           |
| CFA blood flow [ml/min]          | 580 ± 204               | 610 ± 122                | 0.75           |
| TMWD [mm]                        | 79 ± 44                 | 82 ± 43                  | 0.94           |
| ABI                              | 0.67 ± 0.1              | 0.70 ± 0.1               | 0.64           |

ABI = ankle brachial index, AIx@HR75 = frequency-normalized augmentation index, aAP = aortic augmentation pressure, aDBP = aortic diastolic blood pressure, aMAP = aortic mean arterial pressure, aPP = aortic pulse pressure, aSBP = aortic systolic blood pressure, bDBP = brachial diastolic blood pressure, bMAP = brachial mean arterial pressure, bPP = brachial pulse pressure, bSBP = brachial systolic blood pressure, CFA = common femoral artery, CO = cardiac output, EVT = endovascular treatment HR = heart rate, LAVI = left atrial volume index, LVEF = left ventricular ejection fraction, LVMI = left ventricular mass index, PWV = pulse wave velocity, SV = stroke volume, TMWD = treadmill walking distance, TPR = total peripheral resistance, TR= tricuspid regurgitation; Continuous variables are expressed as the mean values and standard



deviations and were compared by an unpaired t test; p – values < 0.05 are considered statistically significant.

**Table S9:** Change in LVDF (left ventricular diastolic function) after endovascular treatment (EVT) as compared to control at different time points. E'septal (A), e'lateral (B), E/é (C), tricuspid regurgitation (TR, D), left atrial volume index (LAVI, E), left ventricular (LV) mean wall thickness (F), female (G) and male (H) left ventricular mass index (LVMI).

| <b>A</b>                        |                 |        |       |                              |
|---------------------------------|-----------------|--------|-------|------------------------------|
| e'septal                        |                 |        |       |                              |
|                                 | mean difference | 95% CI |       | p-value<br>(unpaired t-test) |
| Before vs. after                | 0.64            | 0.45   | 0.83  | <0.0001                      |
| Before vs. follow-up            | 0.71            | 0.49   | 0.92  | <0.0001                      |
| After vs. follow-up             | 0.07            | -0.04  | 0.17  | 0.2                          |
| <b>B</b>                        |                 |        |       |                              |
| e'lateral                       |                 |        |       |                              |
|                                 | mean difference | 95% CI |       | p-value<br>(unpaired t-test) |
| Before vs. after                | 0.92            | 0.59   | 1.24  | <0.0001                      |
| Before vs. follow-up            | 1.05            | 0.67   | 1.43  | <0.0001                      |
| After vs. follow-up             | 0.13            | -0.17  | 0.44  | 0.38                         |
| <b>C</b>                        |                 |        |       |                              |
| E/é                             |                 |        |       |                              |
|                                 | mean difference | 95% CI |       | p-value<br>(unpaired t-test) |
| Before vs. after                | -2.02           | -2.96  | -1.08 | <0.0001                      |
| Before vs. follow-up            | -2.25           | -3.25  | -1.25 | <0.0001                      |
| After vs. follow-up             | -0.23           | -0.52  | 0.06  | 0.11                         |
| <b>D</b>                        |                 |        |       |                              |
| TR [m/s]                        |                 |        |       |                              |
|                                 | mean difference | 95% CI |       | p-value<br>(unpaired t-test) |
| Before vs. after                | -0.23           | -0.31  | -0.15 | <0.0001                      |
| Before vs. follow-up            | -0.30           | -0.42  | -0.19 | <0.0001                      |
| After vs. follow-up             | -0.07           | -0.17  | 0.03  | 0.15                         |
| <b>E</b>                        |                 |        |       |                              |
| LAVI [ml/m <sup>2</sup> ]       |                 |        |       |                              |
|                                 | mean difference | 95% CI |       | p-value<br>(unpaired t-test) |
| Before vs. after                | -3.84           | -5.16  | -2.54 | <0.0001                      |
| Before vs. follow-up            | -4.36           | -5.94  | -2.77 | <0.0001                      |
| After vs. follow-up             | -0.51           | -1.63  | 0.61  | 0.36                         |
| <b>F</b>                        |                 |        |       |                              |
| LV mean wall thickness [mm]     |                 |        |       |                              |
|                                 | mean difference | 95% CI |       | p-value<br>(unpaired t-test) |
| Before vs. after                | -0.08           | -0.16  | 0.01  | 0.08                         |
| Before vs. follow-up            | -0.76           | -0.97  | -0.56 | <0.0001                      |
| After vs. follow-up             | -0.68           | -0.89  | -0.48 | <0.0001                      |
| <b>G</b>                        |                 |        |       |                              |
| female LVMI [g/m <sup>2</sup> ] |                 |        |       |                              |
|                                 | mean difference | 95% CI |       | p-value<br>(unpaired t-test) |
| Before vs. after                | 0.39            | -1.42  | 2.20  | 0.64                         |
| Before vs. follow-up            | -5.22           | -7.83  | -2.62 | 0.0014                       |
| After vs. follow-up             | -7.11           | -9.93  | -4.29 | 0.0003                       |
| <b>H</b>                        |                 |        |       |                              |
| male LVMI [g/m <sup>2</sup> ]   |                 |        |       |                              |
|                                 | mean difference | 95% CI |       | p-value<br>(unpaired t-test) |
| Before vs. after                | 0.67            | -0.84  | 2.16  | 0.37                         |
| Before vs. follow-up            | -7.27           | -10.22 | -4.31 | <0.0001                      |
| After vs. follow-up             | -7.93           | -10.96 | -4.91 | <0.0001                      |

**Table S10:** Multivariate linear regression assessing the correlation between E/e' and peripheral hemodynamics (TPR, CFA blood flow, ABI), aortic function (AIx@HR75, PWV, aSBP, aMAP, arterial compliance) and aortic inflow (CO). All individual baseline and follow-up observations of patients participating in the study were entered into the model (n=90).

|                                |                                      |
|--------------------------------|--------------------------------------|
| <b>Multivariate analysis</b>   | <b>n=90</b>                          |
|                                | R <sup>2</sup> = 0.48, constant = 57 |
| <hr/>                          |                                      |
| <b>Peripheral hemodynamics</b> |                                      |
| TPR                            | Beta-Coeff. = -0.002; p=0.41         |
| CFA flow                       | Beta-Coeff. = -0.006; p=0.12         |
| ABI                            | Beta-Coeff. = 5.9; p=0.07            |
| <b>Aortic function</b>         |                                      |
| aMAP                           | Beta-Coeff. = 0.11; p=0.48           |
| aSBP                           | Beta-Coeff. = 0.02; p=0.73           |
| AIx                            | Beta-Coeff. = -0.27; <b>p=0.048</b>  |
| PWV                            | Beta-Coeff. = -0.06; <b>p=0.013</b>  |
| Compliance                     | Beta-Coeff. = -7.12; <b>p=0.002</b>  |
| <b>Aortic inflow</b>           |                                      |
| CO                             | Beta-Coeff. = -0.44; p=0.75          |

ABI = ankle brachial index, AIx = augmentation index, aMAP = aortic mean arterial pressure, aSBP = aortic systolic blood pressure, CFA = common femoral artery, CO = cardiac output, PWV = pulse wave velocity, SV = stroke volume, TPR = total peripheral resistance

**Table S11:** Multivariate analysis for predictors of E/e' adjusted for cardiovascular disease risk factors.

| Predictors        | Multivariate model |           | Multivariate model adjusted by CAD |           | Multivariate model adjusted by T2D |           | Multivariate model adjusted by Smoking |           | Multivariate model adjusted by CKD |           | Multivariate model adjusted by HLP |           |
|-------------------|--------------------|-----------|------------------------------------|-----------|------------------------------------|-----------|----------------------------------------|-----------|------------------------------------|-----------|------------------------------------|-----------|
|                   | Beta-Coeff.        | p - Value | Beta-Coeff.                        | p - Value | Beta-Coeff.                        | p - Value | Beta-Coeff.                            | p - Value | Beta-Coeff.                        | p - Value | Beta-Coeff.                        | p - Value |
| <b>Aix</b>        | - 0.27             | 0.048     | - 0.175                            | 0.049     | - 0.166                            | 0.037     | - 0.180                                | 0.047     | - 0.160                            | 0.044     | - 0.192                            | 0.036     |
| <b>PWV</b>        | - 0.06             | 0.013     | - 0.449                            | 0.048     | - 0.512                            | 0.022     | - 0.440                                | 0.042     | - 0.388                            | 0.042     | - 0.348                            | 0.043     |
| <b>Compliance</b> | - 7.12             | 0.002     | - 5.732                            | 0.019     | - 7.639                            | 0.002     | - 5.410                                | 0.023     | - 6.420                            | 0.011     | - 2.933                            | 0.002     |

Aix = augmentation index, PWV = pulse wave velocity, CAD = coronary artery disease, CKD = chronic kidney disease, HLP = hyperlipoproteinemia, T2D = type 2 diabetes

## FIGURE LEGENDS

**Figure S1.** HFA-PEFF Score before endovascular treatment and at follow-up. Wilcoxon signed-rank test was used to calculate P values.

**Figure S2.** Impact of peripheral endovascular treatment (EVT) on pulsatile left ventricular afterload. Change in characteristic impedance of the proximal aorta ( $Z_c$ ; A), and reflection coefficient (RC; B) before (circle), after (triangle) and at the follow-up (square) after elective EVT (n=25) or diagnostic angiography alone as a control (n=5). Unpaired t-test was used to calculate P values.

**Figure S3.** Change in mean  $E/e'$  (A) and left atrial volume index (LAVI, B) after unilateral (n=17) and bilateral (n=8) endovascular treatment (EVT) at before (circle) and after EVT (triangle). Unpaired t-test was used to calculate deltas at different time points.

**Figure S4.** Relationship of changes in  $E/e'$  to common femoral artery (CFA) flow, ankle brachial index (ABI), and treadmill walking distance (TMWD). A, Correlation of changes in CFA flow ( $\Delta$  CFA flow) and changes in  $E/e'$  ( $\Delta E/e'$ ). B, Correlation between changes in ABI ( $\Delta$  ABI) and  $E/e'$ . C, Correlation of changes in TMWD ( $\Delta$  TMWD) and changes in  $E/e'$  ( $\Delta E/e'$ ).

**Figure S5.** Correlation between changes in  $E/e'$  ( $\Delta E/e'$  before vs after) and stent volume.

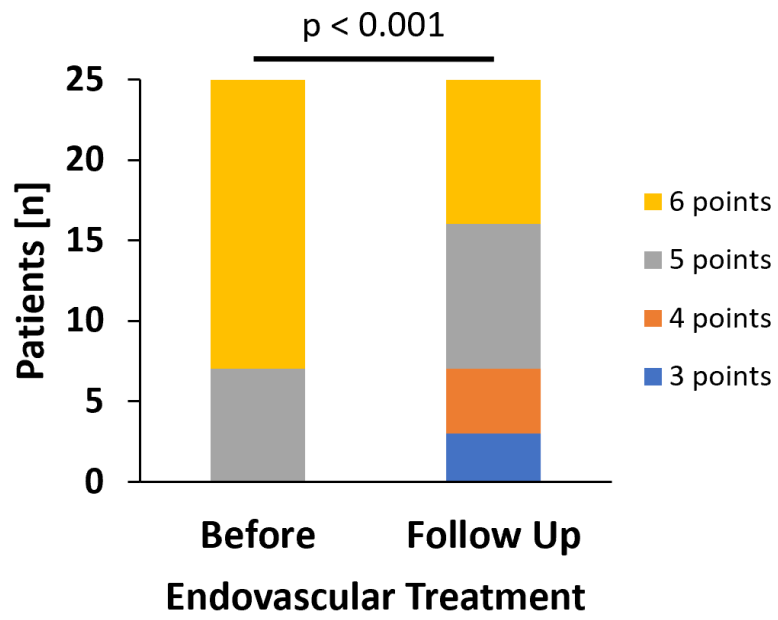

Figure S1

A

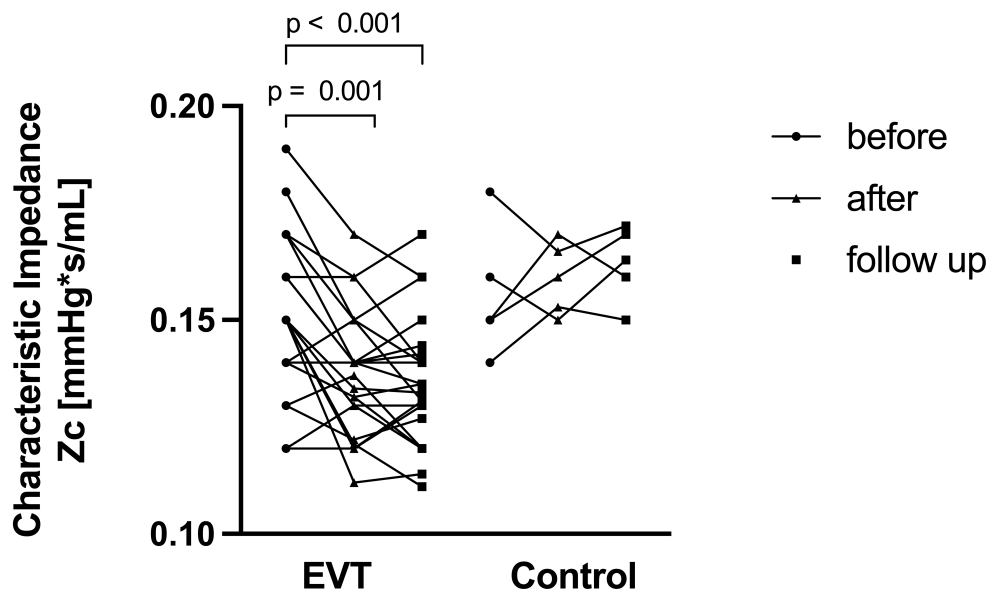

B

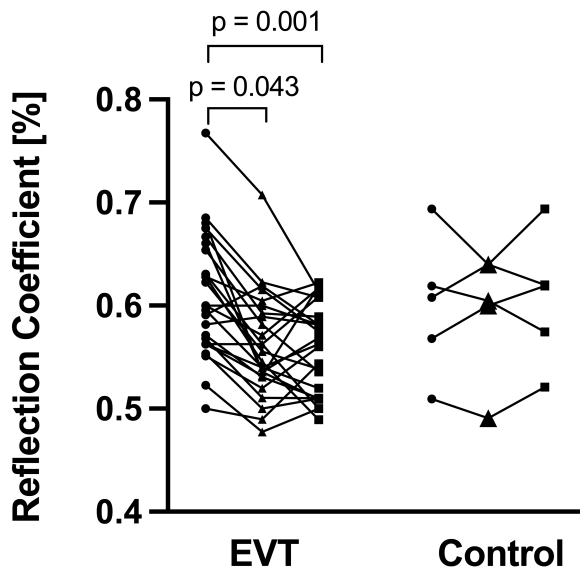

Figure S2

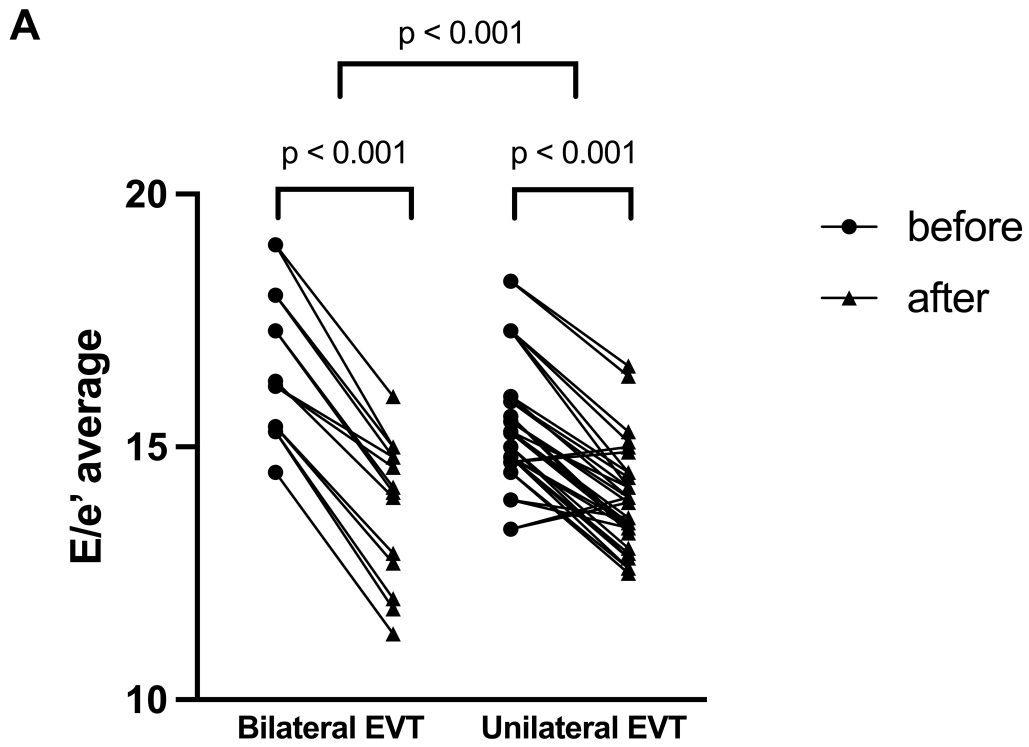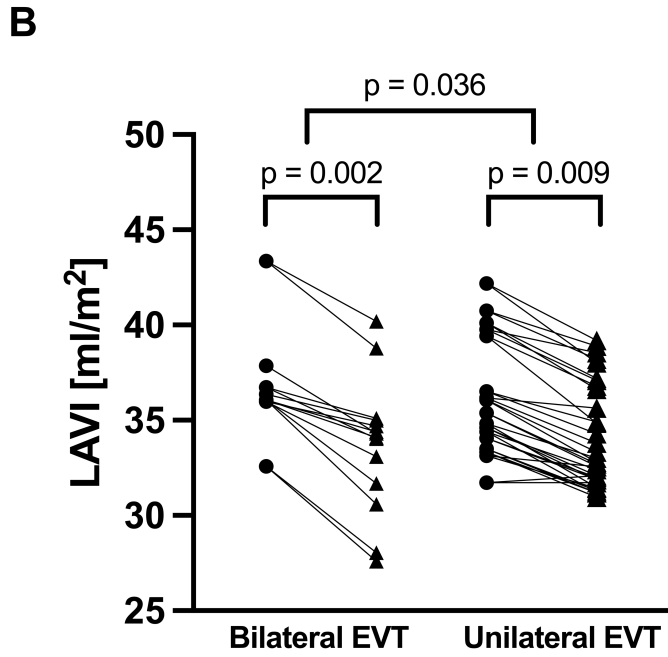

Figure S3



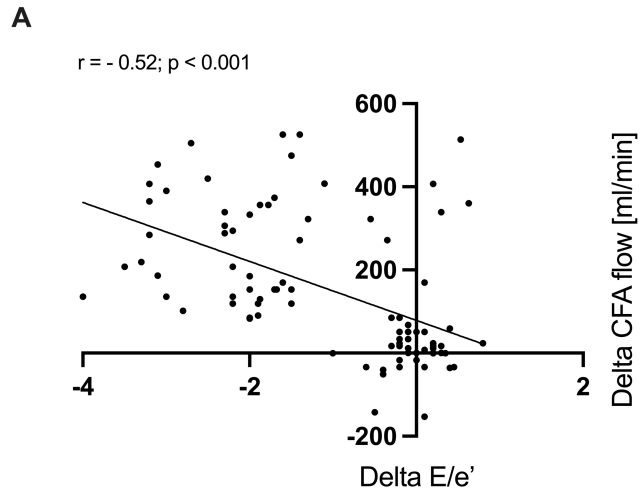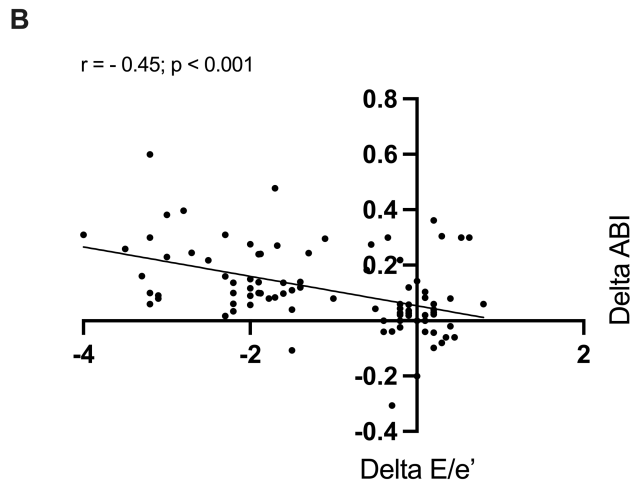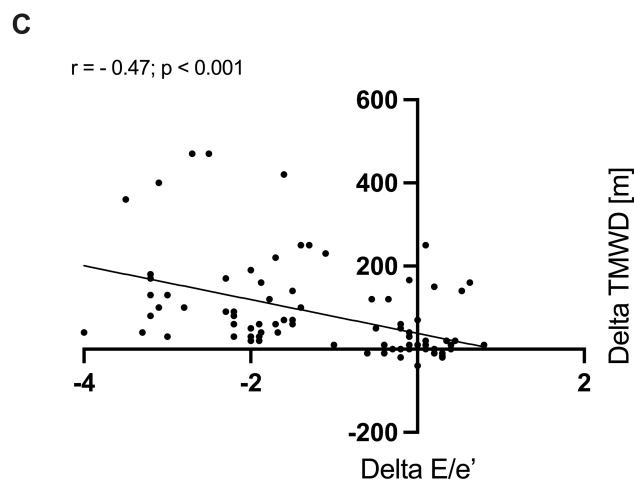

Figure S4

$r = -0.52; p = 0.007$

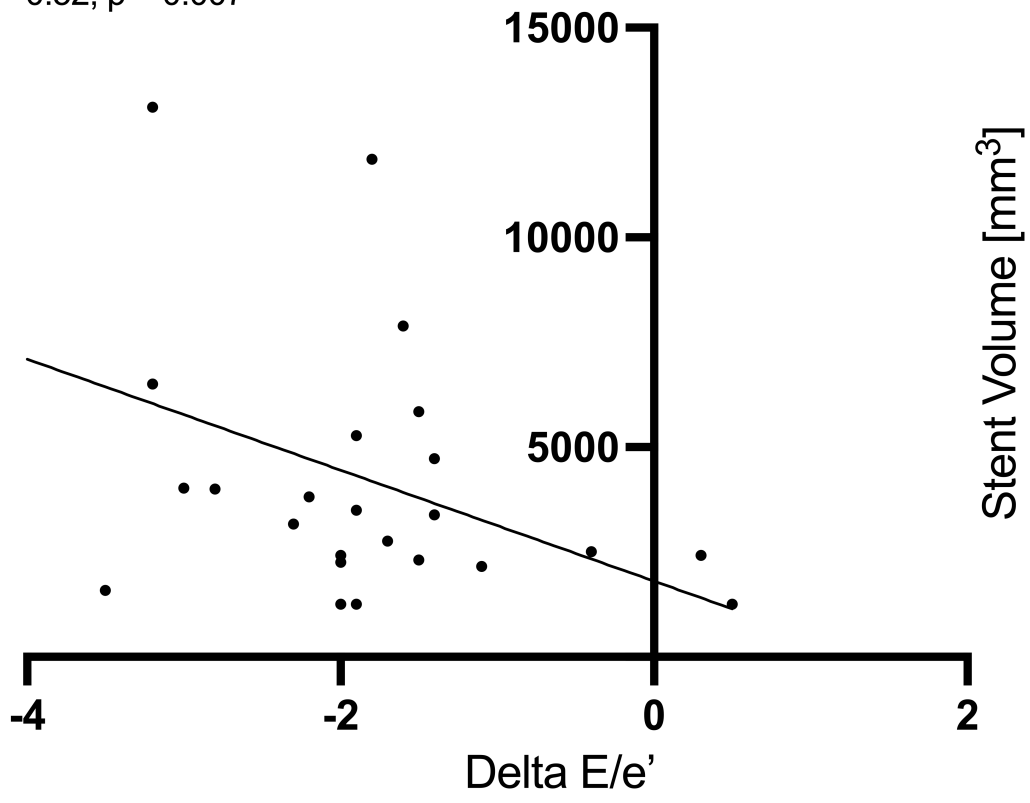

Figure S5
